# Supplementary material for: Discovery of penicillic acid as a chemical probe against tau aggregation in Alzheimer's disease
Source: Royal Society of Chemistry journal article supplement (doi:10.1039/d4sc05469e), 2024-01-01
Supplement: d4sc05469e1.pdf [file d4sc05469e1.pdf]

## Supporting Information

### Discovery of penicillic acid as a chemical probe against tau aggregation in Alzheimer's Disease

Jennifer Shyong<sup>†a</sup>, Jinliang Wang<sup>†a</sup>, Tran Quoc Dung Huynh<sup>c</sup>, Marina Fayzullina<sup>a</sup>, Bo Yuan<sup>a</sup>, Ching-Kuo Lee<sup>c,d</sup>, Thomas Minehan<sup>e</sup>, Paul M. Seidler<sup>\*a</sup>, Clay C. C. Wang<sup>\*a,b</sup>

<sup>a</sup> Department of Pharmacology and Pharmaceutical Sciences, Alfred E. Mann School of Pharmacy and Pharmaceutical Sciences, University of Southern California, Los Angeles, California 90089, United States

<sup>b</sup> Department of Chemistry, University of Southern California, Dornsife College of Letters, Arts, and Sciences, Los Angeles, California 90089, United States

<sup>c</sup> School of Pharmacy, College of Pharmacy, Taipei Medical University, Taipei 11031, Taiwan

<sup>d</sup> Ph.D. Program in Clinical Drug Development of Herbal Medicine, College of Pharmacy, Taipei Medical University, Taipei 11031, Taiwan

<sup>e</sup> Department of Chemistry and Biochemistry, California State University, Northridge, Northridge, California 91330, United States

<sup>†</sup> These authors contributed equally

\*Co-corresponding authors

Correspondence should be addressed to [clayw@usc.edu](mailto:clayw@usc.edu) , [pseidler@usc.edu](mailto:pseidler@usc.edu)

## Table of Contents

|                                                                                                            |     |
|------------------------------------------------------------------------------------------------------------|-----|
| <b>Figure S1.</b> Confirmation of <i>mcrAΔ</i> in IMV01140.                                                | S2  |
| <b>Figure S2.</b> LC-MS analysis of screening different conditions of IMV01140 cultivation.                | S3  |
| <b>Figure S3.</b> Natural product library characterization of compounds.                                   | S4  |
| <b>Figure S4.</b> <sup>1</sup> H NMR spectrum of penicillic acid in methanol-d <sub>4</sub> .              | S5  |
| <b>Figure S5.</b> <sup>13</sup> C NMR spectrum of penicillic acid in methanol-d <sub>4</sub> .             | S6  |
| <b>Figure S6.</b> Mass spectrometry data of penicillic acid.                                               | S7  |
| <b>Figure S7.</b> <sup>1</sup> H NMR spectrum of mactanamide (2) in methanol-d <sub>4</sub> .              | S8  |
| <b>Figure S8.</b> <sup>13</sup> C NMR spectrum of mactanamide (2) in methanol-d <sub>4</sub> .             | S9  |
| <b>Figure S9.</b> <sup>1</sup> H NMR spectrum of notoamide F (3) in methanol-d <sub>4</sub> .              | S10 |
| <b>Figure S10.</b> <sup>1</sup> H NMR spectrum of notoamide R (4) in methanol-d <sub>4</sub> .             | S11 |
| <b>Figure S11.</b> <sup>13</sup> C NMR spectrum of notoamide R (4) in methanol-d <sub>4</sub> .            | S12 |
| <b>Figure S12.</b> <sup>1</sup> H NMR spectrum of orsellinic acid (20) in methanol-d <sub>4</sub> .        | S13 |
| <b>Figure S13.</b> <sup>13</sup> C NMR spectrum of orsellinic acid (20) in methanol-d <sub>4</sub> .       | S14 |
| <b>Figure S14.</b> <sup>1</sup> H NMR spectrum of orcinol (21) in methanol-d <sub>4</sub> .                | S15 |
| <b>Figure S15.</b> <sup>13</sup> C NMR spectrum of orcinol (21) in methanol-d <sub>4</sub> .               | S16 |
| <b>Figure S16.</b> <sup>1</sup> H NMR spectrum of 2,5-furandimethanol (22) in methanol-d <sub>4</sub> .    | S17 |
| <b>Figure S17.</b> <sup>13</sup> C NMR spectrum of 2,5-furandimethanol (22) in methanol-d <sub>4</sub> .   | S18 |
| <b>Figure S18.</b> ThT assay on inhibitory of PA in aggregation.                                           | S19 |
| <b>Figure S19.</b> IC <sub>50</sub> of PA.                                                                 | S20 |
| <b>Figure S20.</b> SAR study of penicillic acid using biosensor cell seeding assay as an activity readout. | S21 |
| <b>Table S1.</b> Primers used in this study.                                                               | S22 |
| <b>Table S2.</b> Structural characterization of compounds found in natural product library.                | S23 |

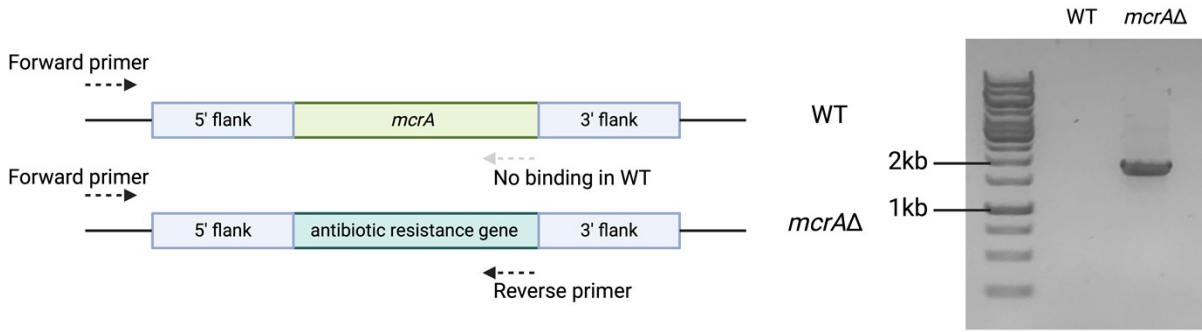

**Figure S1.** Confirmation of *mcrA*Δ in IMV01140. Nested primers were designed to amplify hygromycin resistance gene since *mcrA* coding region and selectable marker HygB are similar in size. Only strains with resistance gene would have a band (~1.8kb).

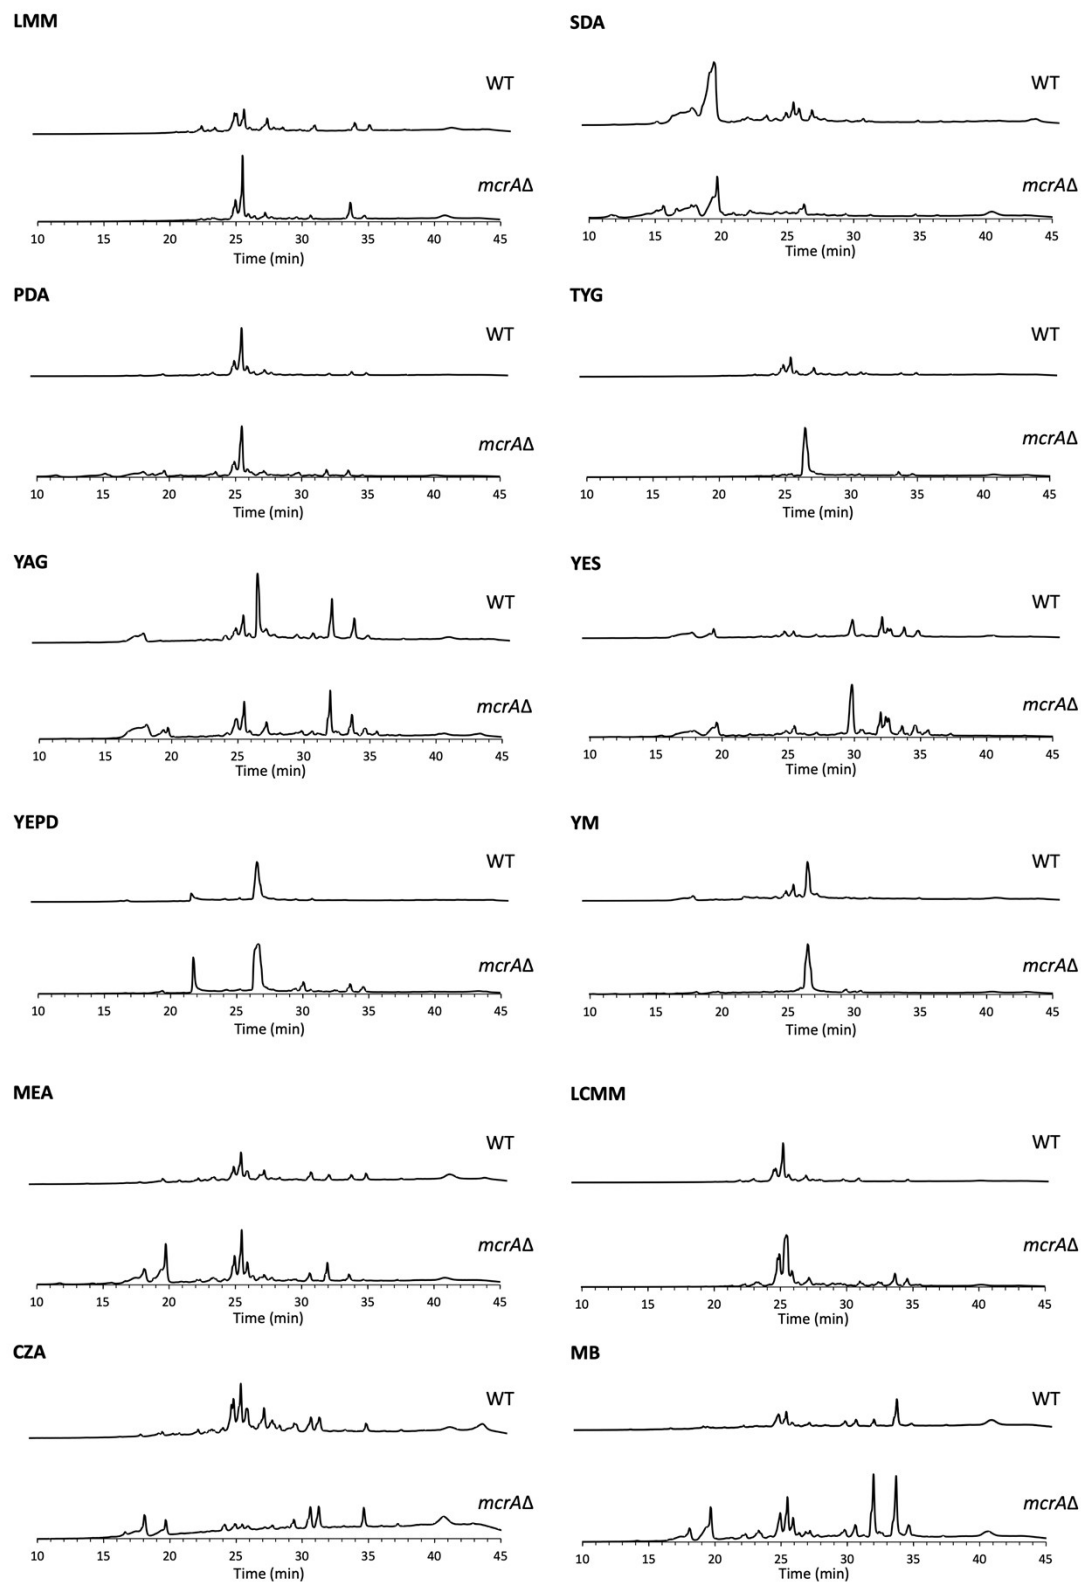

**Figure S2.** Screening fungal cultivation conditions using HPLC analysis. WT and mutant strains were cultured in 12 different conditions at 28°C for 6 days.

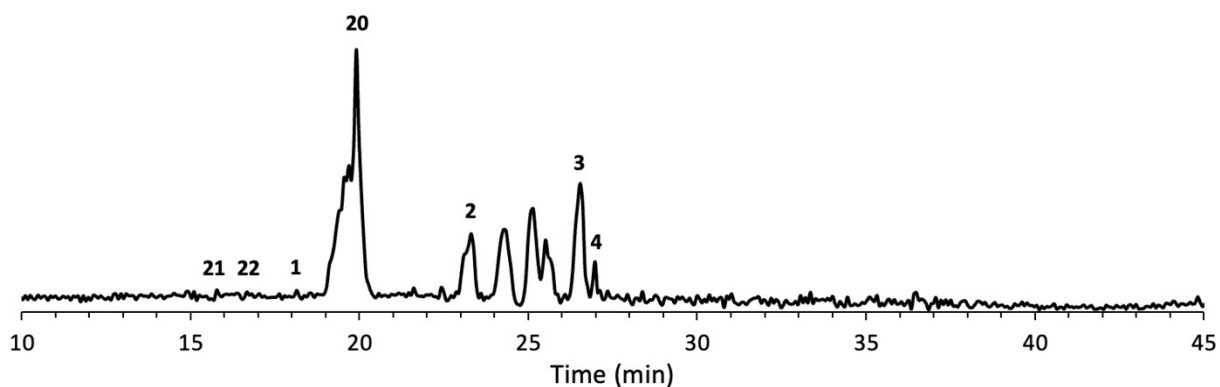

**Figure S3.** Characterization of select compounds in natural product library. Base peak of TIC in negative mode, range 100.0-500.0 for demonstration of major compounds. The following compounds were identified: (1) Penicillic acid, (2) Mactanamide, (3) Notoamide F, (4) Notoamide R, (20) Orsellinic acid, (21) Orcinol, (22) 2,5-furandimethanol.

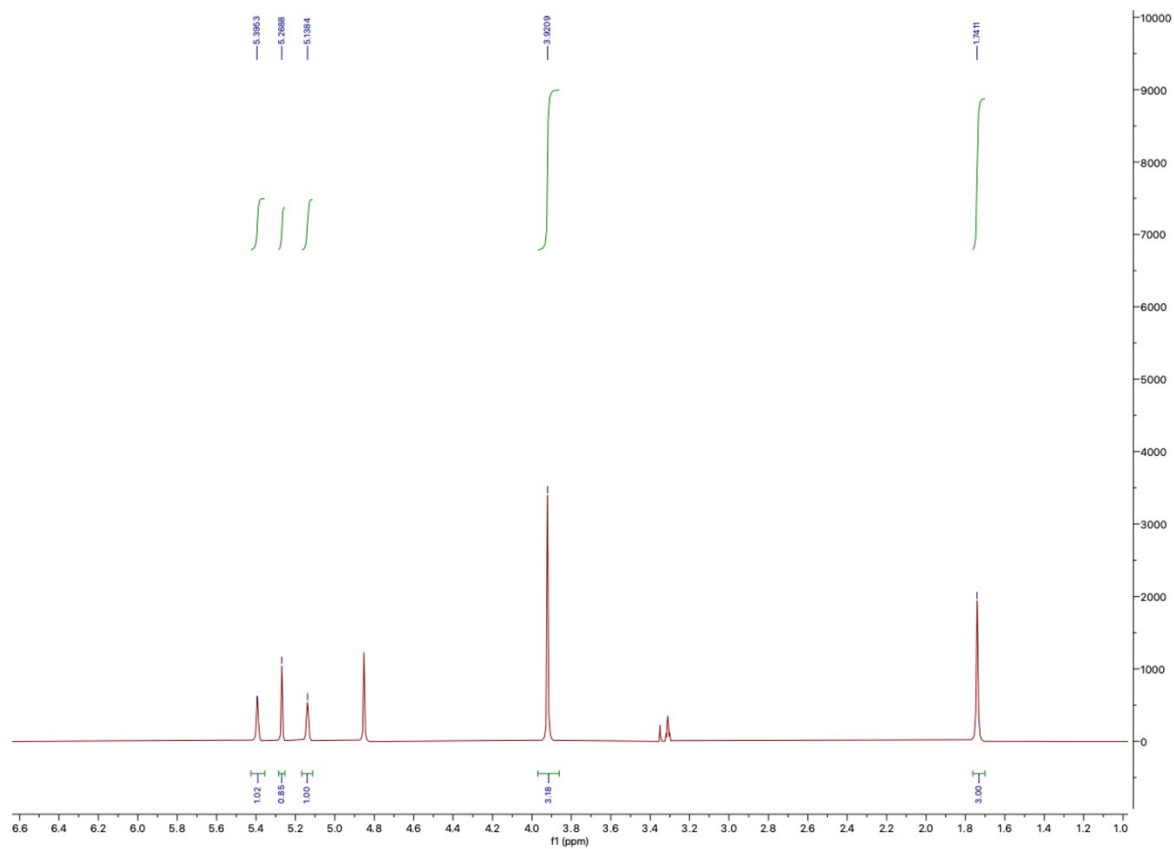

**Figure S4.**  $^1\text{H}$  NMR spectrum of penicillic acid in methanol- $\text{d}_4$ .

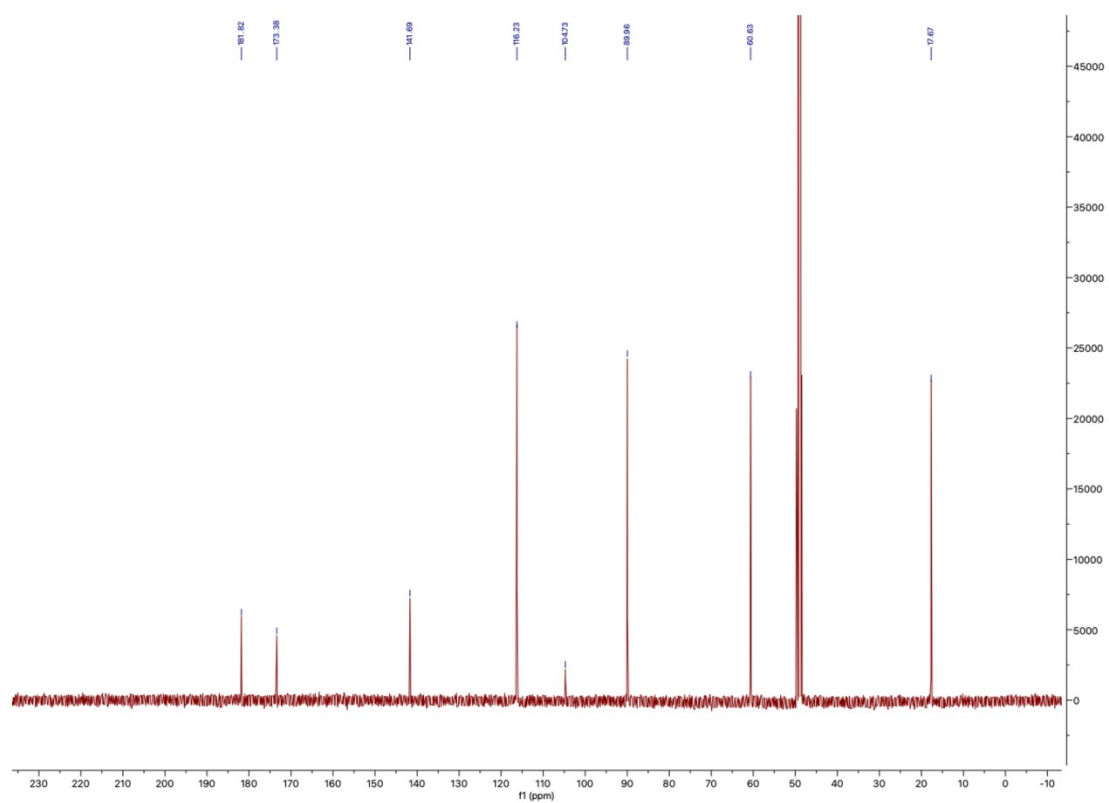

**Figure S5.**  $^{13}\text{C}$  NMR spectrum of penicillic acid in methanol- $\text{d}_4$ .

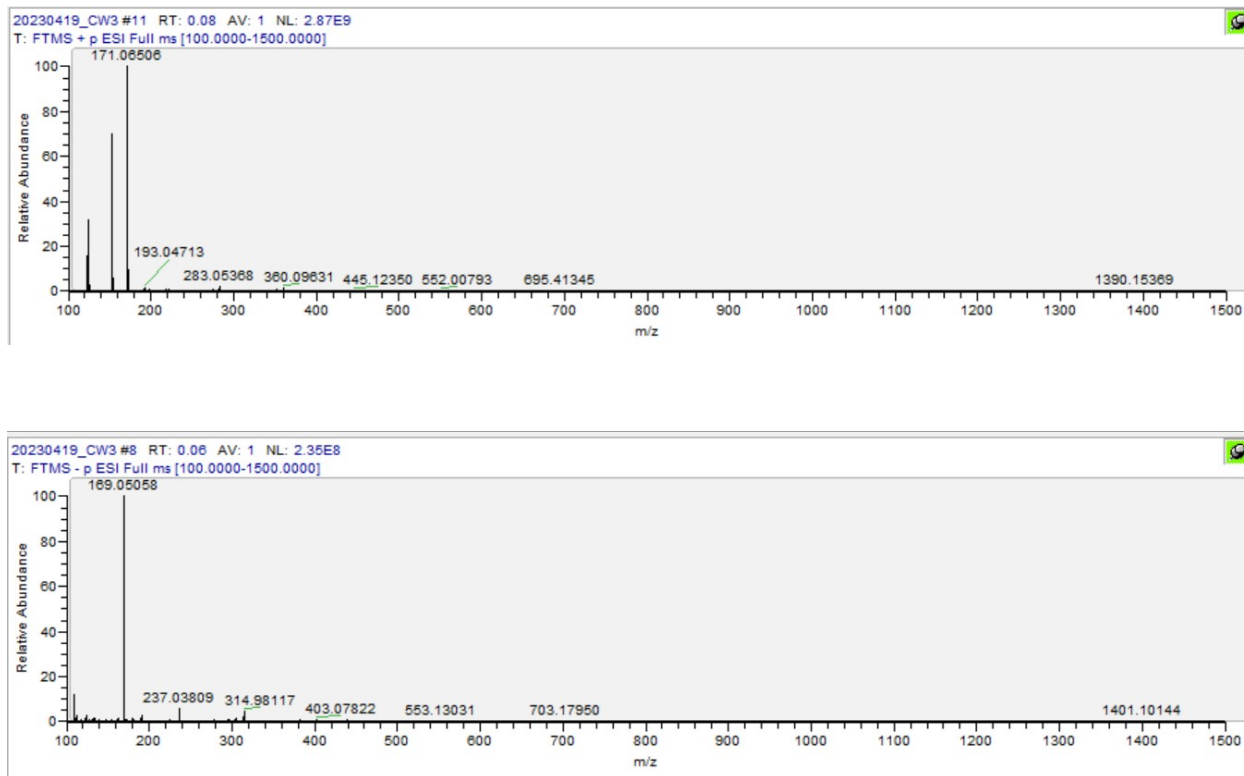

**Figure S6.** Mass spectrometry data of penicillic acid. Top represents penicillic acid in positive TIC (169  $[M+H]^+$ ). Bottom represents penicillic acid in negative TIC (171  $[M-H]^-$ ).

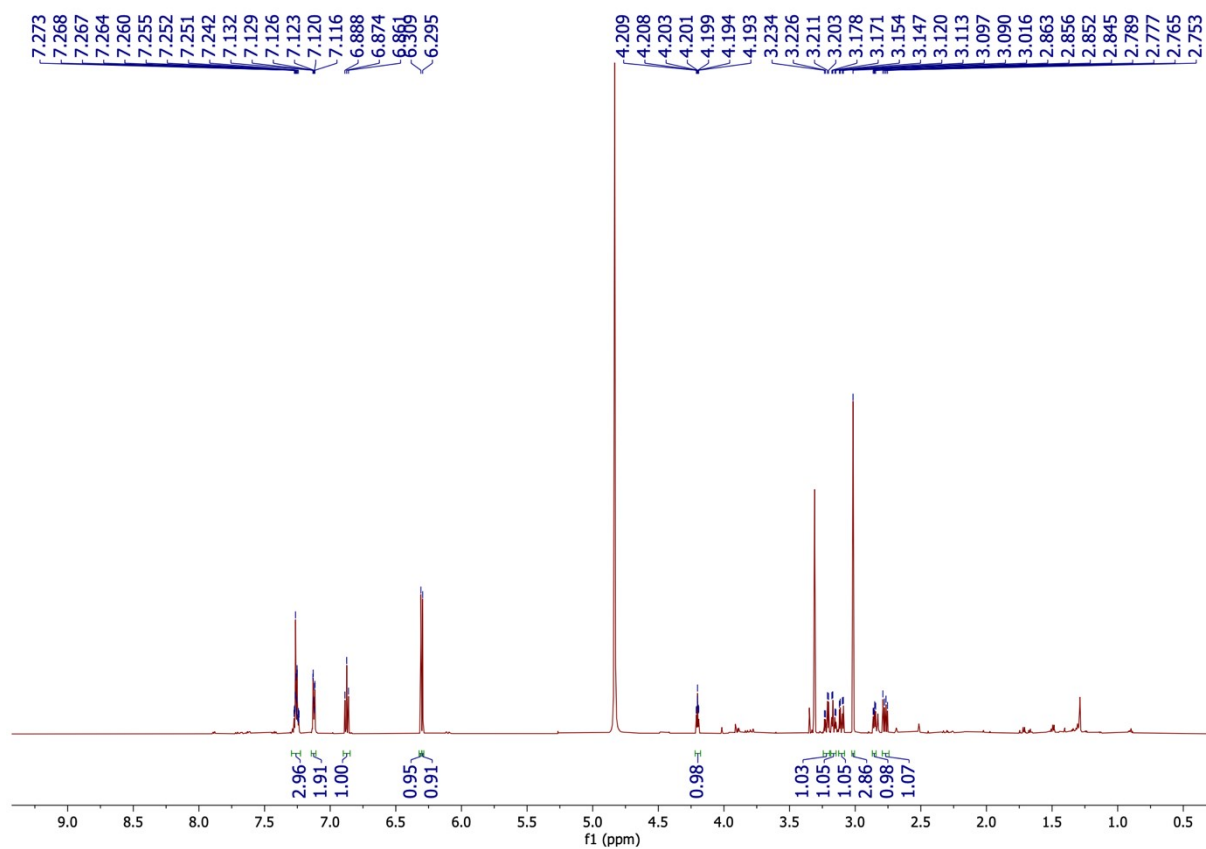

**Figure S7.**  $^1\text{H}$  NMR spectrum of mactanamide (2) in methanol- $\text{d}_4$ .

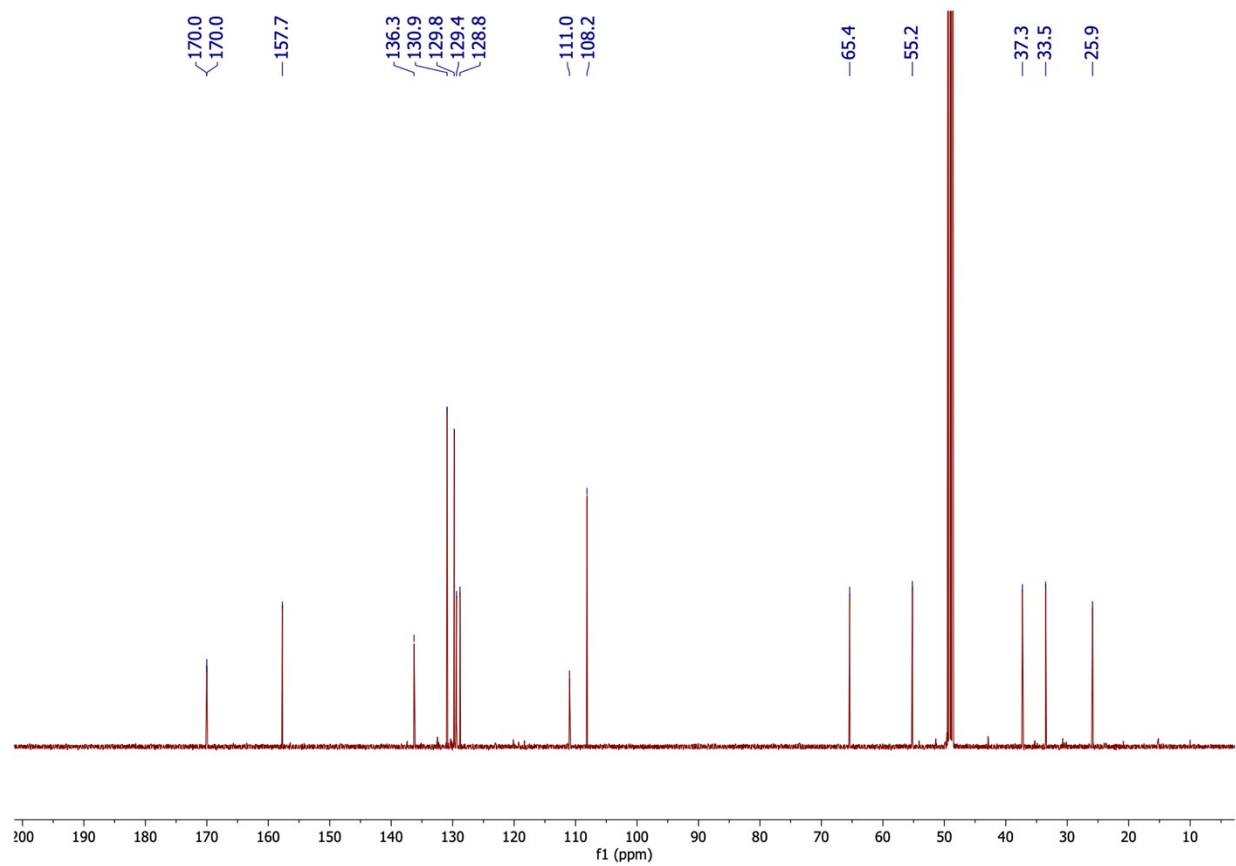

**Figure S8.** <sup>13</sup>C NMR spectrum of mactanamide (2) in methanol-d<sub>4</sub>.

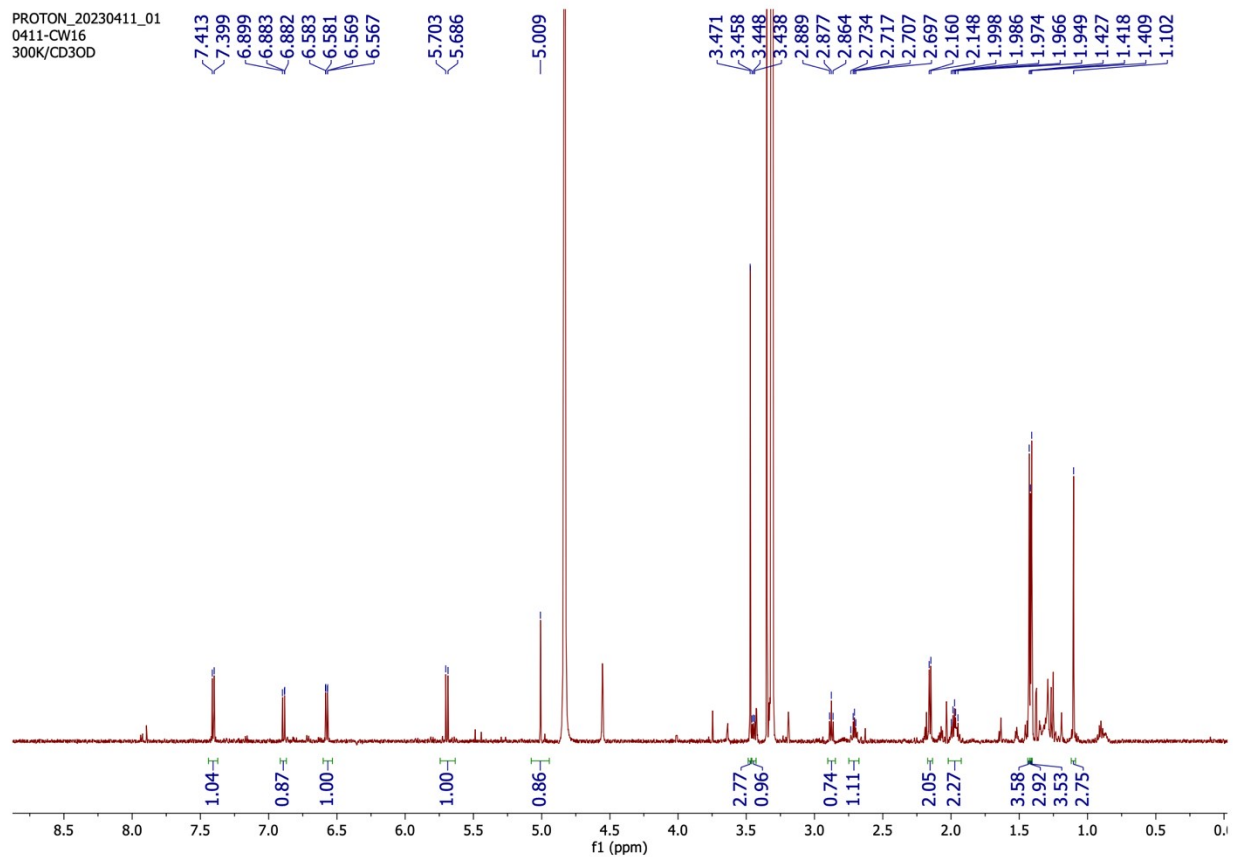

**Figure S9.**  $^1\text{H}$  NMR spectrum of notoamide F (3) in methanol- $\text{d}_4$ .

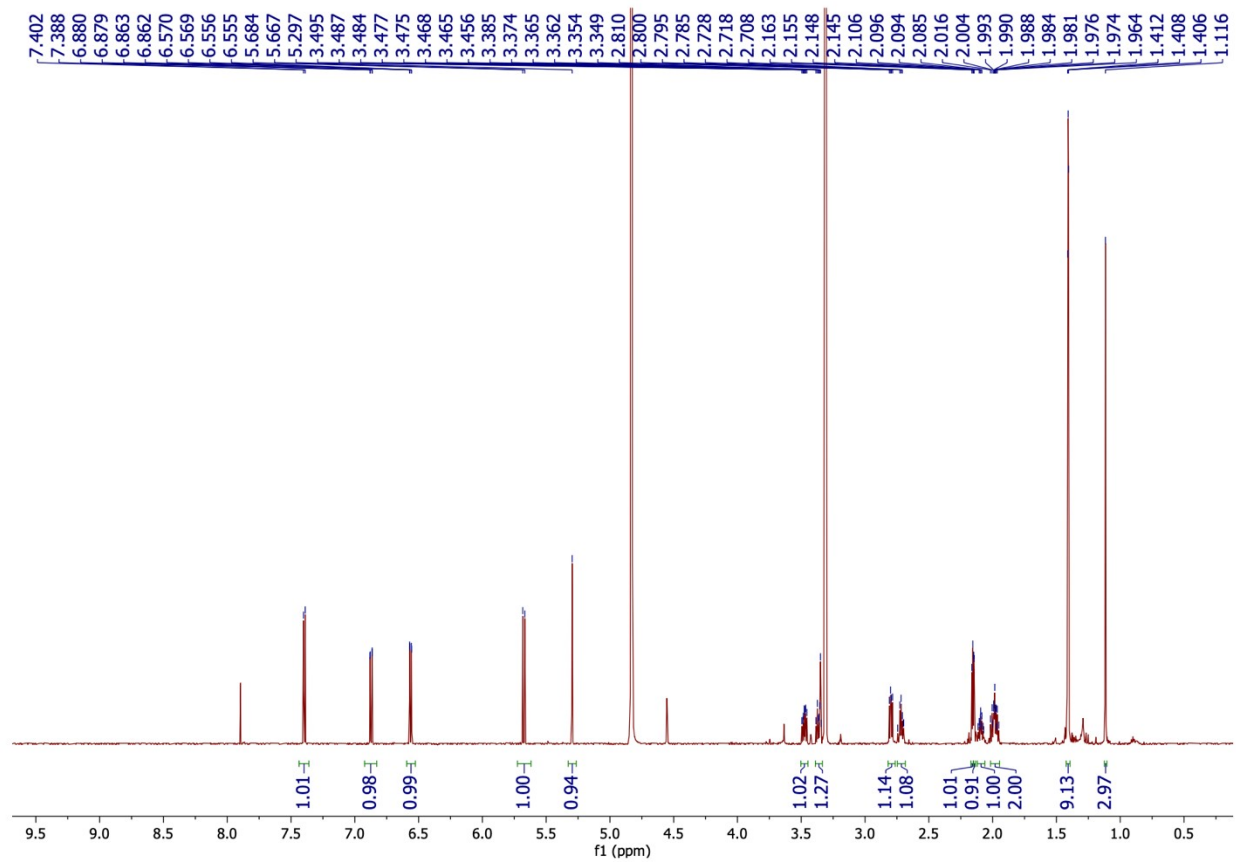

**Figure S10.**  $^1\text{H}$  NMR spectrum of notoamide R (4) in methanol- $d_4$ .

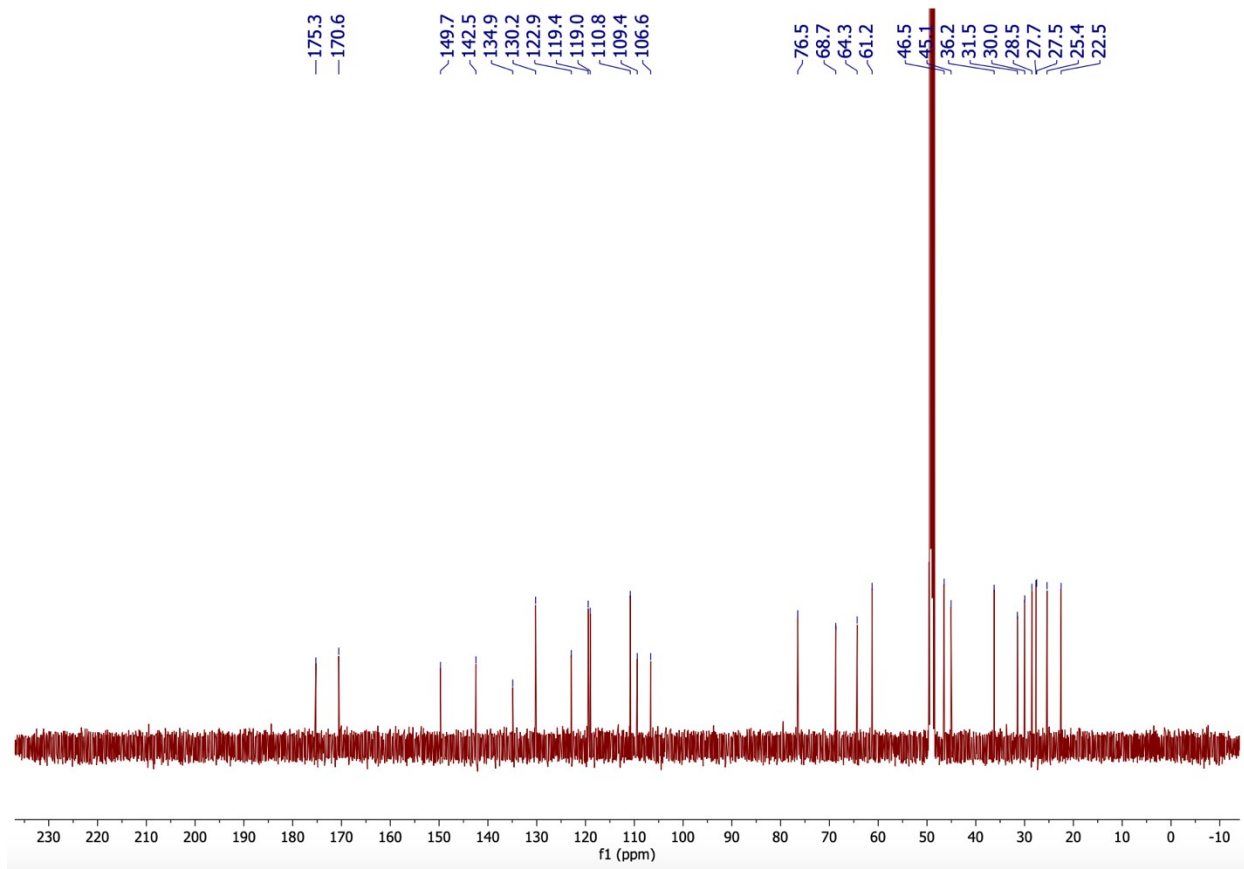

**Figure S11.** <sup>13</sup>C NMR spectrum of notoamide R (4) in methanol-d<sub>4</sub>.

PROTON\_20230327\_01  
0327-CW4  
300K/CD3OD

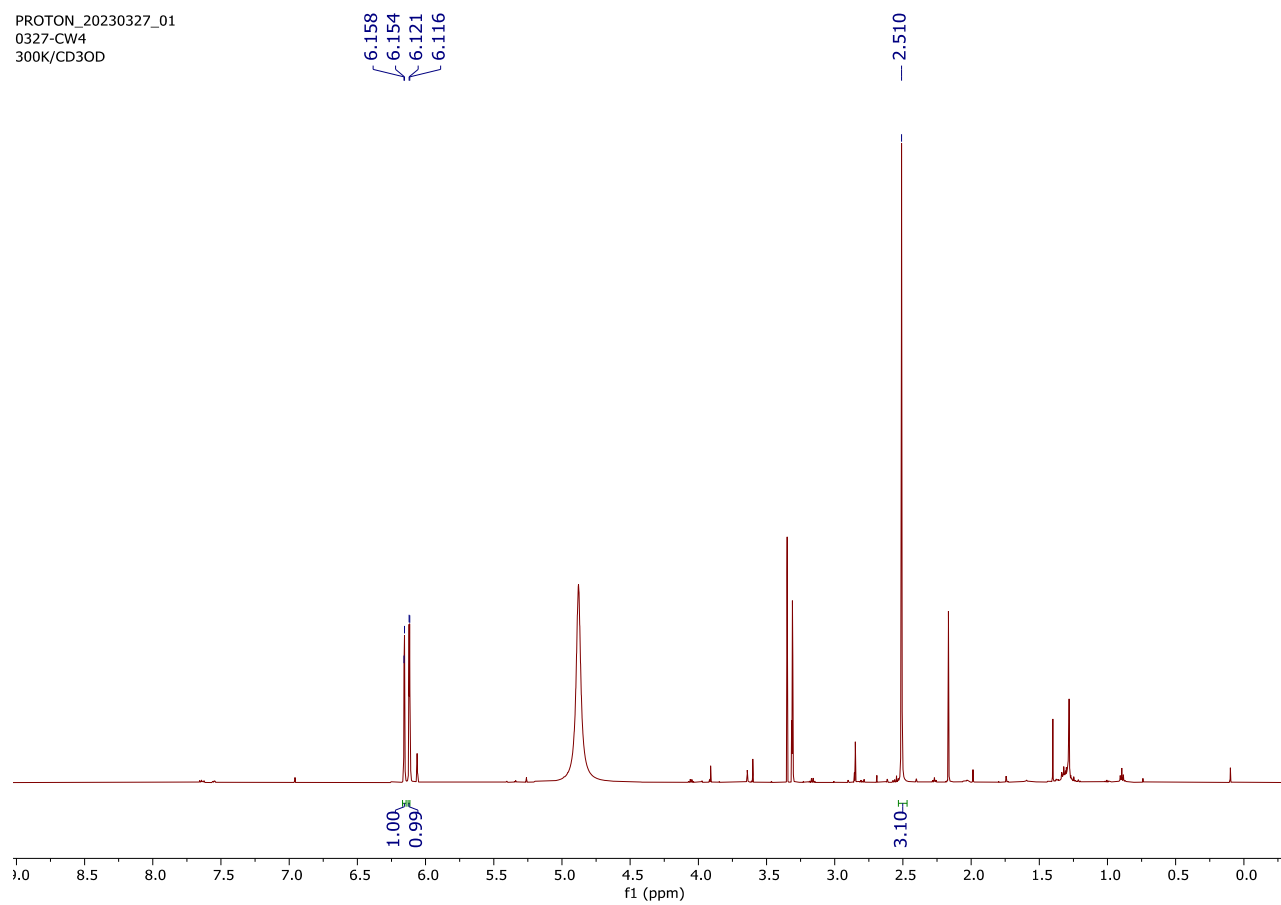

**Figure S12.**  $^1\text{H}$  NMR spectrum of orsellinic acid (20) in methanol- $d_4$ .

CARBON\_20230505\_02  
0327-CW4  
300K/CD3OD

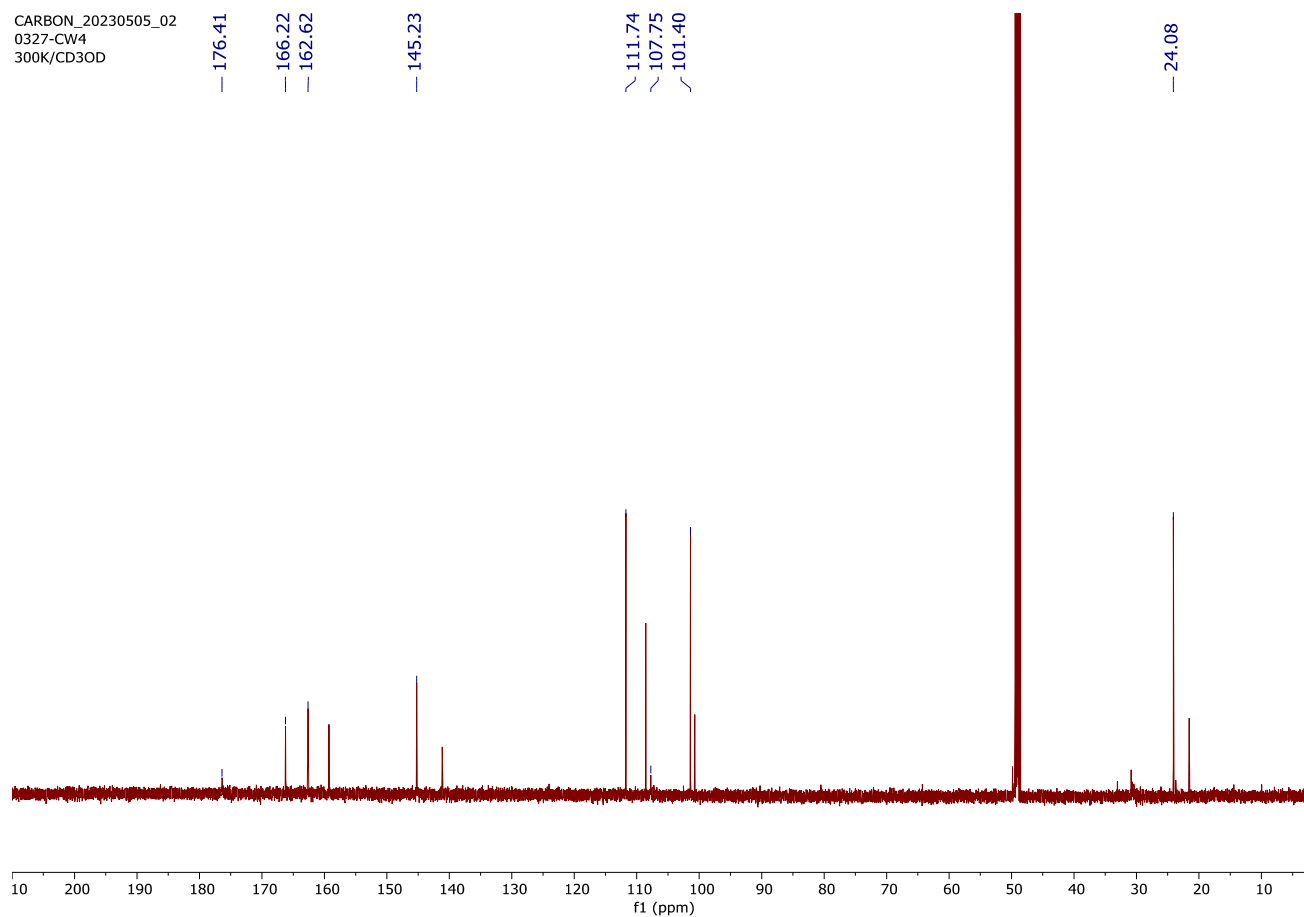

**Figure S13.**  $^{13}\text{C}$  NMR spectrum of orsellinic acid (20) in methanol- $\text{d}_4$ .

PROTON\_20230327\_01  
0327-CW5  
300K/CD3OD

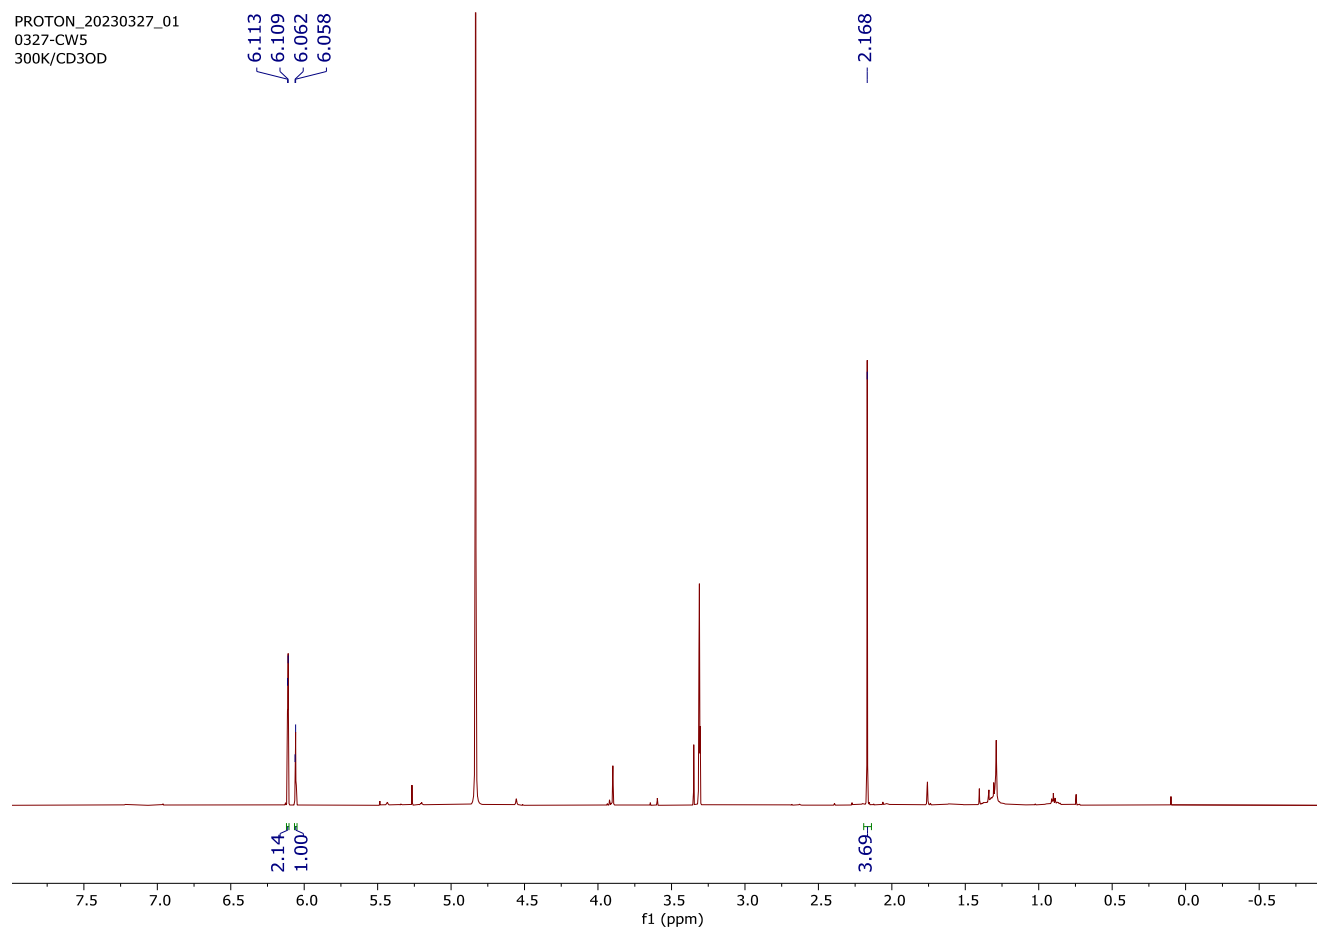

**Figure S14.**  $^1\text{H}$  NMR spectrum of orcinol (21) in methanol- $d_4$ .

CARBON\_20230428\_01  
0327-CW5  
300K/CD3OD

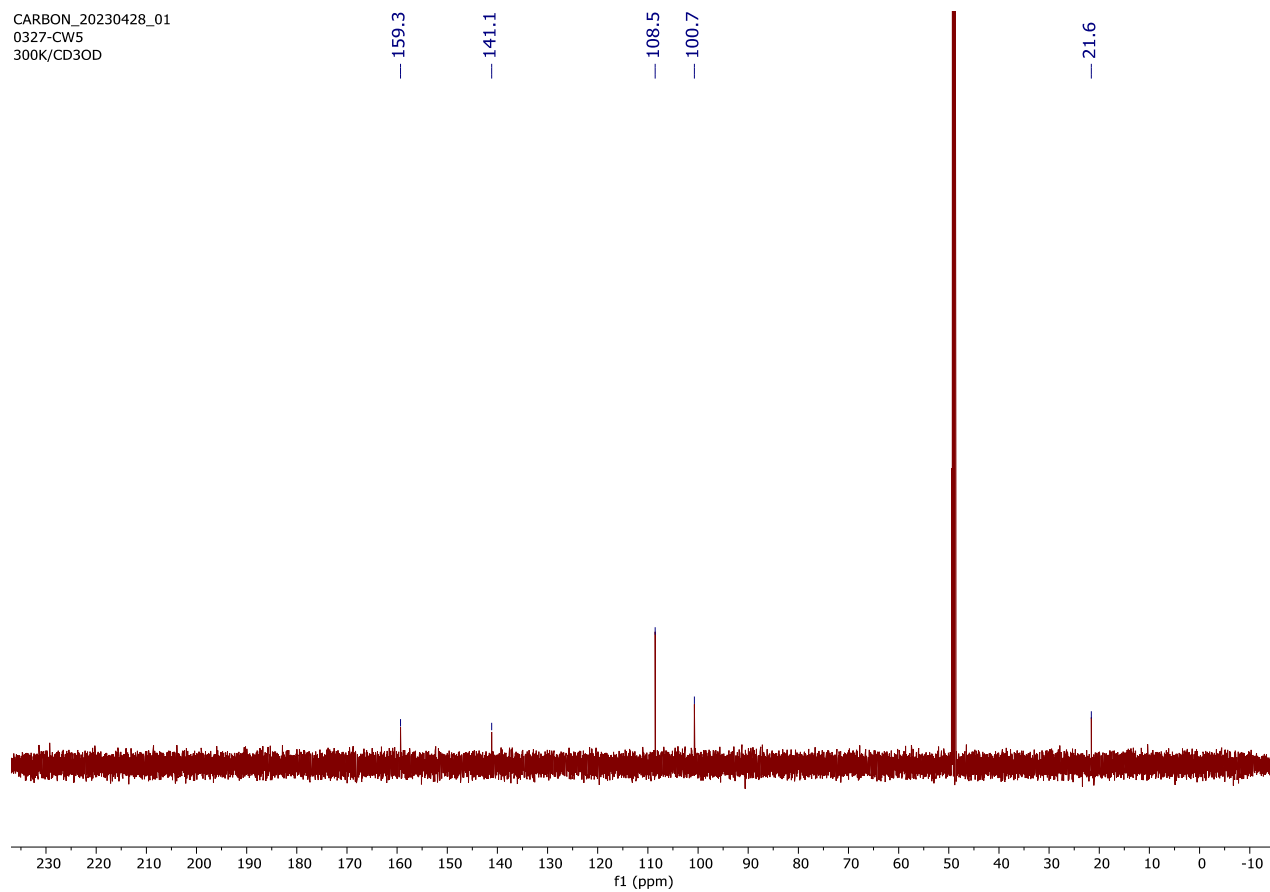

**Figure S15.**  $^{13}\text{C}$  NMR spectrum of orcinol (21) in methanol- $\text{d}_4$ .

PROTON\_20230411\_01  
0411-CW7  
300K/CD3OD

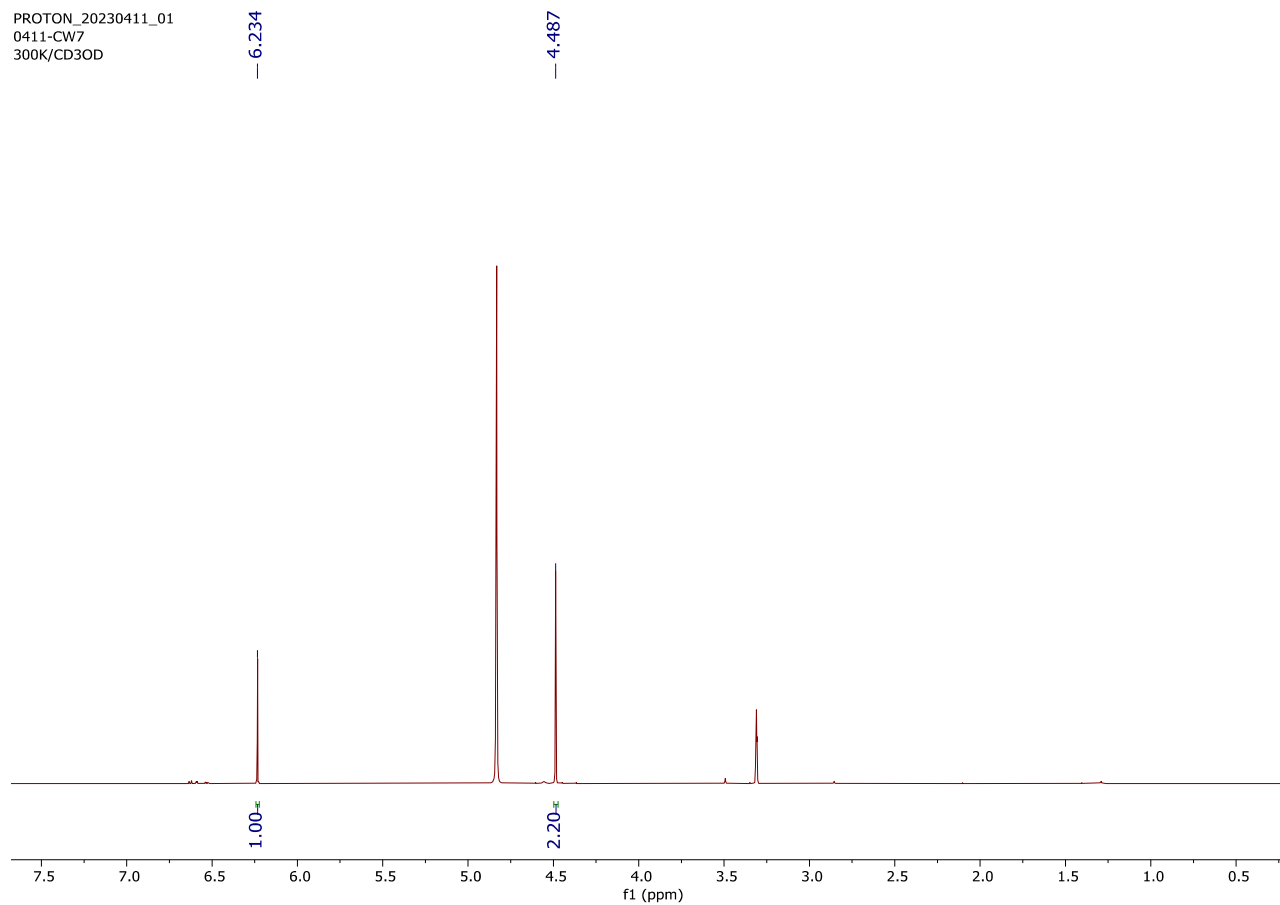

**Figure S16.**  $^1\text{H}$  NMR spectrum of 2,5-furandimethanol (22) in methanol- $\text{d}_4$ .

CARBON\_20230510\_02  
0510-CW7  
300K/CD3OD

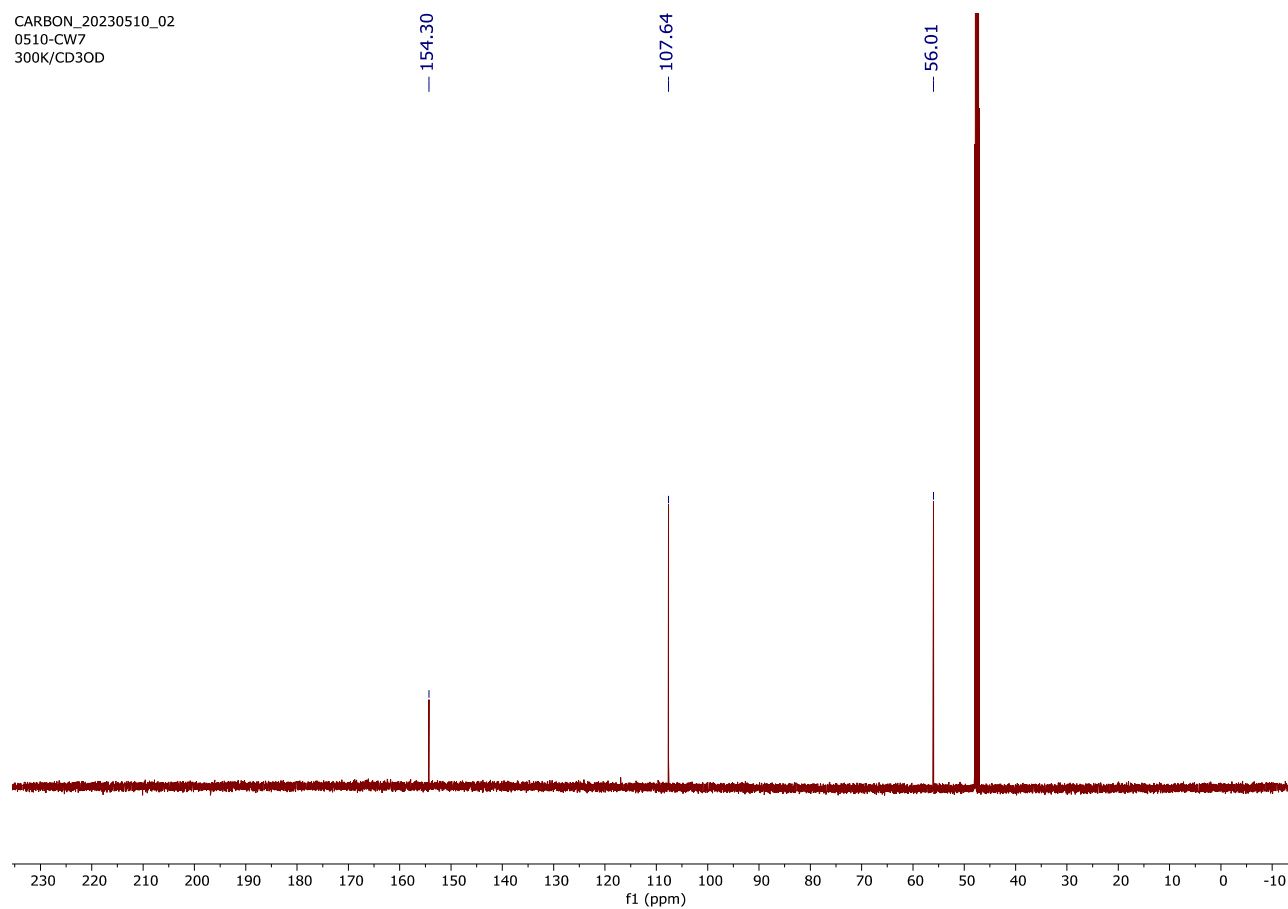

**Figure S17.**  $^{13}\text{C}$  NMR spectrum of 2,5-furandimethanol (22) in methanol- $\text{d}_4$ .

### ThT assay on Inhibitory of Penicillic Acid in Aggregation

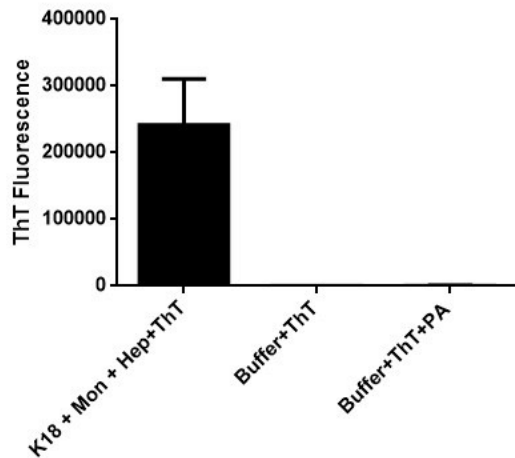

**Figure S18.** ThT assay on inhibitory of PA in aggregation. Error bars represent standard deviations of triplicate measures.

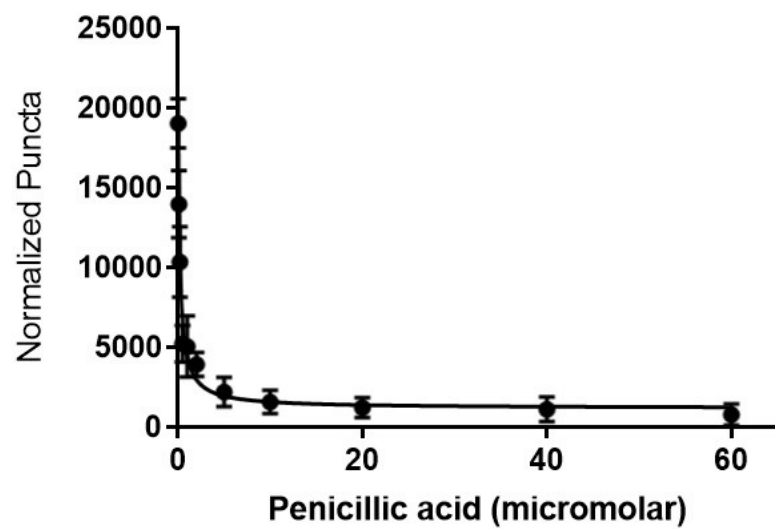

**Figure S19.** IC<sub>50</sub> of PA. Using nonlinear curve fitting, we determined the IC<sub>50</sub> of PA to be 213 nM.

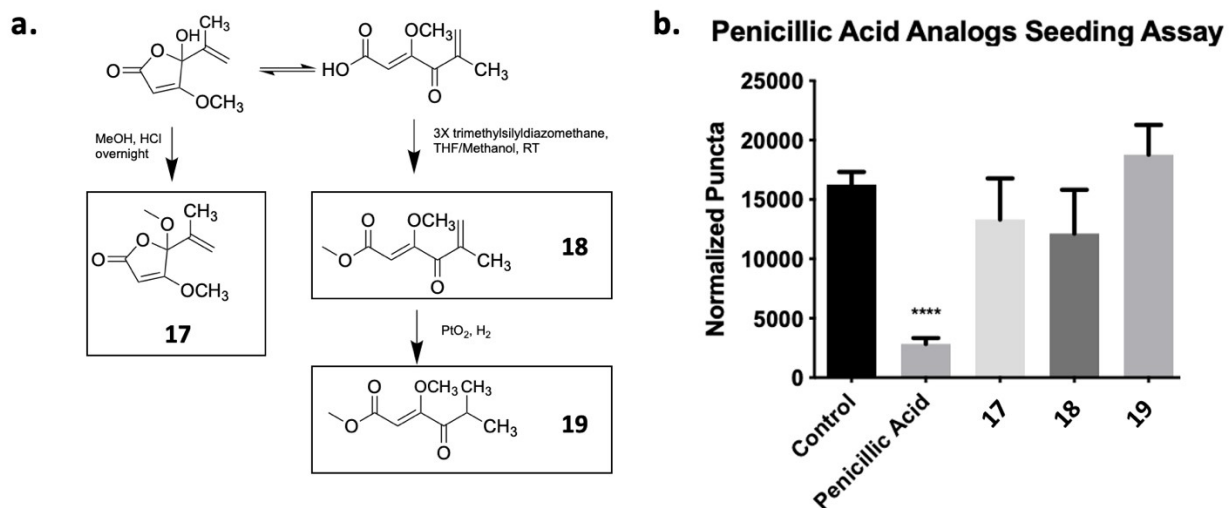

**Figure S20.** SAR study of penicillic acid using biosensor cell seeding assay as an activity readout. (a) Penicillic acid analogs were synthesized as a series of keto-acid and lactone-stabilized forms (Compounds 17-19). (b) The biosensor seeding tau inhibition assay was used as an activity readout for analogs 17-19.

**Table S1.** Primers used in this study. (Yuan, et al. 2023)

| <b>Sequencing primers used for diagnostic PCR (Confirmation of knockout)</b> |                      |
|------------------------------------------------------------------------------|----------------------|
| Primer                                                                       | Sequence (5' → 3')   |
| IMV1140_mcrA_seq_FW                                                          | GAACTCCGCATTGCAATCCT |
| IMV1140_mcrA_seq_REV                                                         | GACCGCTTAATGCGGTAGTG |

**Table S2.** Structural characterization of compounds found in natural product library.

**Penicillic acid:** Molecular formula of  $C_8H_{10}O_4$  based on HRESIMS  $m/z$  171.06507  $[M+H]^+$  (cald for  $C_8H_{11}O_4$ ).  $^1H$  NMR (400 MHz,  $CD_3OD$ )  $\delta$  (ppm)= 5.39 (brs, 1H), 5.27 (s, 1H), 5.14 (brs, 1H), 3.92 (s, 3H), 1.74 (s, 3H).  $^{13}C$  NMR (100 MHz,  $CD_3OD$ )  $\delta$  (ppm)=181.7, 173.3, 141.6, 116.1, 104.6, 89.9, 60.5, 17.6.

**Orsellinic acid:** Molecular formula of  $C_8H_8O_4$  based on HRESIMS  $m/z$  169.04936  $[M+H]^+$  (cald for  $C_8H_9O_4$ ).  $^1H$  NMR (600 MHz,  $CD_3OD$ )  $\delta$  (ppm)= 6.16 (d,  $J=2.4$ , 1H), 6.12 (d,  $J=2.8$ , 1H), 2.51 (s, 3H).  $^{13}C$  NMR (150 MHz,  $CD_3OD$ )  $\delta$  (ppm)=176.4, 166.2, 162.6, 145.2, 111.7, 107.8, 101.4, 24.1.

**Orcinol:** Molecular formula of  $C_7H_8O_2$  based on HRESIMS  $m/z$  293.10284  $[2M+HCOO]^-$  (cald for  $C_{15}H_{17}O_6$ ).  $^1H$  NMR (600 MHz,  $CD_3OD$ )  $\delta$  (ppm)= 6.11 (d,  $J=2.4$ , 2H), 6.06 (d,  $J=2.4$ , 1H), 2.17 (s, 4H).  $^{13}C$  NMR (150 MHz,  $CD_3OD$ )  $\delta$  (ppm)=159.3, 141.1, 108.5, 100.7, 21.6.

**2,5-furandimethanol:** Molecular formula of  $C_6H_8O_3$  based on HRESIMS  $m/z$  279.08368  $[2M+Na]^-$  (cald for  $C_{12}H_{16}O_6Na$ ).  $^1H$  NMR (600 MHz,  $CD_3OD$ )  $\delta$  (ppm)= 6.23 (s, 1H), 4.49 (s, 2H).  $^{13}C$  NMR (1150 MHz,  $CD_3OD$ )  $\delta$  (ppm)=154.3, 107.6, 56.0.

**Mactanamide:** Molecular formula of  $C_{19}H_{20}N_2O_4$  based on HRESIMS  $m/z$  339.13501  $[M-H]^-$  (cald for  $C_{19}H_{19}N_2O_4$ ).  $^1H$  NMR (600 MHz,  $CD_3OD$ )  $\delta$  (ppm) = 7.25 (ovl, 1H), 7.24 (ovl, 2H), 7.12 (m, 2H), 6.87 (t,  $J=8.1$ , 1H), 6.31 (d,  $J=8.1$ , 2H), 4.20 (ddd,  $J=4.9$ , 4.1, 0.9, 1H), 3.22 (dd,  $J=14.1$ , 4.9, 1H), 3.16 (dd,  $J=14.1$ , 4.1, 1H), 3.11 (dd,  $J=14.0$ , 4.2, 1H), 3.02 (s, 3H), 2.85 (dd,  $J=7.1$ , 4.2, 1H), 2.77 (dd,  $J=14.0$ , 7.2, 1H).  $^{13}C$  NMR (150 MHz,  $CD_3OD$ )  $\delta$  (ppm)=  $\delta$  170.0, 170.0, 157.7, 136.3, 130.9, 129.8, 129.4, 128.8, 111.0, 108.2, 65.4, 55.2, 37.3, 33.5, 25.9.

**Notoamide R:** Molecular formula of  $C_{26}H_{29}N_3O_4$  based on HRESIMS  $m/z$  448.22244  $[M+H]^+$  (cald for  $C_{26}H_{30}N_3O_4$ ).  $^1H$  NMR (600 MHz,  $CD_3OD$ )  $\delta$  (ppm) = 7.40 (d,  $J=8.4$ , 1H), 6.87 (d,  $J=9.8$ , 1H), 6.56 (d,  $J=8.4$ , 1H), 5.68 (d,  $J=9.8$ , 1H), 5.30 (s, 1H), 3.48 (m, 1H), 3.35 (m, 1H), 2.80 (dd,  $J=9.0$ , 5.9, 1H), 2.71 (m, 1H), 2.16 (d,  $J=4.7$ , 1H), 2.15 (ovl, 2H), 2.09 (m, 1H), 2.00 (m, 1H), 1.96 (m, 1H), 1.41 (s, 3H), 1.41 (s, 3H), 1.41 (s, 3H), 1.12 (s, 3H).  $^{13}C$  NMR (150 MHz,  $CD_3OD$ )  $\delta$  (ppm)= 175.3, 170.6, 149.7, 142.5, 134.9, 130.2, 122.9, 119.4, 119.0, 110.8, 109.4, 106.6, 76.5, 68.7, 64.3, 61.2, 46.5, 45.1, 36.2, 31.5, 30.0, 28.5, 27.7, 27.5, 25.4, 22.5.

**Notoamide F:** Molecular formula of  $C_{27}H_{31}N_3O_4$  based on HRESIMS  $m/z$  462.23737  $[M+H]^+$  (cald for  $C_{27}H_{33}N_3O_4$ ).  $^1H$  NMR (600 MHz,  $CD_3OD$ )  $\delta$  (ppm) = 7.40 (d,  $J=8.5$ , 1H), 6.88 (d,  $J=10.0$ , 1H), 6.57 (d,  $J=8.5$ , 1H), 5.69 (d,  $J=10.0$ , 1H), 3.46 (s, 3H), 1.42 (s, 3H), 1.41 (s, 3H), 1.40 (s, 3H), 1.10 (s, 3H).
